# Supplementary material for: Information and Communication Technologies in Lung Transplantation: Perception of Patients and Medical Teams
Source: MDPI journal article supplement (doi:10.3390/pharmacy10040075), 2022-06-30
Supplement: s1 [file s1]

**Table S1.** 15 multiple response questions.

- Q1 Reminder for healthcare appointments in pneumology department
- Q2 Reminder for the shifting of tacrolimus intake to 8pm the eve of the dosage
- Q3 Information of a change in dosage of tacrolimus
- Q4 Information sending a new prescription (to the patient or fax to the pharmacy)
- Q5 Information on the need of a blood sample to do in the laboratory city
- Q6 Information sending a new prescription (to the patient or fax to the laboratory)
- Q7 Information from the prescription of a new drug
- Q8 Reminder for daily immunosuppressive drug intake
- Q9 Reminder for daily others drug intake
- Q10 Reminder for punctual drug intake
- Q11 Reminder for punctual healthcare appointments
- Q12 Reminder for get vaccinated against influenza
- Q13 Reminder for do and transmit to the measures of breath with Spirotel®
- Q14 Information stopping certain medications before an exam
- Q15 Means of communication and questions / answers patients / medical team
